# Supplementary material for: α-Fodrin in Cytoskeletal Organization and the Activity of Certain Key Microtubule Kinesins
Source: MDPI journal article supplement (doi:10.3390/genes12050750), 2021-05-17
Supplement: s1 [file s1]

| S. No.                         | Uniprot ID | Uniprot Name                                                 | Gene name | Peptide count | Fold change | Anova score | Mol. wt. (Daltons) | pI   |
|--------------------------------|------------|--------------------------------------------------------------|-----------|---------------|-------------|-------------|--------------------|------|
| List of Downregulated Proteins |            |                                                              |           |               |             |             |                    |      |
| 1                              | Q86U42     | Polyadenylate-binding protein 2                              | PABPN1    | 2             | 5.07        | 0.022       | 32617.88           | 5.04 |
| 2                              | Q03468     | DNA excision repair protein ERCC-6                           | ERCC6     | 10            | 1.91        | 0.021       | 168416.12          | 8.28 |
| 3                              | A8K979     | ERI1 exoribonuclease 2                                       | ERI2      | 5             | 13.40       | 0.001       | 77400.64           | 9.12 |
| 4                              | Q8N4N8     | Kinesin-like protein KIF2B                                   | KIF2B     | 2             | 2.28        | 0.002       | 76253.79           | 8.89 |
| 5                              | Q9HAV7     | GrpE protein homolog 1_ mitochondrial                        | GRPEL1    | 5             | 3.54        | 0.005       | 21336.46           | 6.03 |
| 6                              | Q13151     | Heterogeneous nuclear ribonucleoprotein A0                   | HNRNPA0   | 12            | 3.18        | 0.000       | 30840.62           | 9.34 |
| 7                              | Q9H6S0     | Probable ATP-dependent RNA helicase YTHDC2                   | YTHDC2    | 11            | 2.61        | 0.009       | 160248.45          | 8.68 |
| 8                              | Q8TBY8     | Polyamine-modulated factor 1-binding protein 1               | PMFBP1    | 29            | 3.38        | 0.001       | 117493.79          | 5.94 |
| 9                              | Q8N162     | Olfactory receptor 8H2                                       | OR8H2     | 1             | 369.66      | 0.001       | 35421.99           | 9.03 |
| 10                             | Q99445     | Glycosyl-phosphatidylinositol-anchored molecule-like protein | GML       | 2             | 38.24       | 0.016       | 15918.41           | 6.67 |
| 11                             | Q14524     | Sodium channel protein type 5 subunit alpha                  | SCN5A     | 3             | 8.46        | 0.002       | 226939.85          | 5.34 |
| 12                             | Q8N4W9     | Zinc finger protein 808                                      | ZNF808    | 16            | 1.91        | 0.020       | 104824.7           | 9.59 |

|    |        |                                                                   |          |    |       |       |           |       |
|----|--------|-------------------------------------------------------------------|----------|----|-------|-------|-----------|-------|
| 13 | Q13905 | Rap guanine nucleotide exchange factor 1                          | RAPGEF1  | 9  | 2.96  | 0.001 | 120547.62 | 5.64  |
| 14 | Q04837 | Single-stranded DNA-binding protein_ mitochondrial                | SSBP1    | 11 | 2.23  | 0.005 | 15195.14  | 8.24  |
| 15 | Q71DI3 | Histone H3.2                                                      | HIST2H3A | 22 | 2.99  | 0.001 | 15388.03  | 11.27 |
| 16 | Q86V35 | Calcium-binding protein 7;CABP7                                   | CABP7    | 87 | 2.08  | 0.001 | 24453.07  | 4.56  |
| 17 | Q02539 | Histone H1.1                                                      | HIST1H1A | 10 | 24.04 | 0.005 | 21710.9   | 10.99 |
| 18 | Q9UBR2 | Cathepsin Z                                                       | CTSZ     | 3  | 3.33  | 0.010 | 27149.11  | 5.48  |
| 19 | Q4LEZ3 | Alanine and arginine-rich domain-containing protein               | AARD     | 2  | 3.47  | 0.007 | 17574.78  | 5.78  |
| 20 | Q86YF9 | Zinc finger protein DZIP1                                         | DZIP1    | 16 | 2.36  | 0.003 | 98663.69  | 5.8   |
| 21 | Q96AG4 | Leucine-rich repeat-containing protein 59                         | LRRC59   | 17 | 2.03  | 0.011 | 34930.46  | 9.61  |
| 22 | P19022 | Cadherin-2                                                        | CDH2     | 3  | 3.69  | 0.002 | 82030.01  | 4.43  |
| 23 | P50402 | Emerin                                                            | EMD      | 6  | 2.20  | 0.016 | 28993.86  | 5.29  |
| 24 | O15303 | Metabotropic glutamate receptor 6;GRM6                            | GRM6     | 25 | 11.95 | 0.021 | 92772.43  | 7.98  |
| 25 | Q8TEJ3 | SH3 domain-containing RING finger protein 3                       | SH3RF3   | 4  | 2.56  | 0.005 | 92776.22  | 9.09  |
| 26 | P11166 | Solute carrier family 2_ facilitated glucose transporter member 1 | SLC2A1   | 15 | 2.85  | 0.011 | 54083.78  | 8.93  |
| 27 | P07355 | Annexin A2                                                        | ANXA2    | 87 | 2.07  | 0.001 | 38472.85  | 7.56  |
| 28 | Q13740 | CD166 antigen                                                     | ALCAM    | 7  | 3.44  | 0.015 | 62262.86  | 5.71  |

| S. No.                         | Uniprot ID | Uniprot Name                                                 | Gene name | Peptide count | Fold change | Anova score | Mol. wt. (Daltons) | pI    |
|--------------------------------|------------|--------------------------------------------------------------|-----------|---------------|-------------|-------------|--------------------|-------|
| List of Downregulated Proteins |            |                                                              |           |               |             |             |                    |       |
| 29                             | Q9UJX4     | Anaphase-promoting complex subunit 5                         | ANAPC5    | 3             | 1.76        | 0.006       | 85076.94           | 6.4   |
| 30                             | Q96JH7     | Deubiquitinating protein VCIP135                             | VCPIP1    | 12            | 5.75        | 0.012       | 134320.52          | 6.77  |
| 31                             | P53985     | Monocarboxylate transporter 1                                | SLC16A1   | 5             | 2.51        | 0.001       | 53944.15           | 8.91  |
| 32                             | P28331     | NADH-ubiquinone oxidoreductase 75 kDa subunit_ mitochondrial | NDUFS1    | 12            | 8.07        | 0.000       | 76975.37           | 5.42  |
| 33                             | Q9P1V8     | Sterile alpha motif domain-containing protein 15             | SAMD15    | 5             | 1.79        | 0.006       | 77150.69           | 4.43  |
| 34                             | P22087     | rRNA 2'-O-methyltransferase fibrillarin                      | FBL       | 13            | 2.67        | 0.005       | 33784.22           | 10.18 |
| 35                             | P10586     | Receptor-type tyrosine-protein phosphatase F                 | PTPRF     | 2             | 500.00      | 0.000       | 210043.4           | 5.91  |
| 36                             | Q8WWL7     | G2/mitotic-specific cyclin-B3                                | CCNB3     | 10            | 4.22        | 0.002       | 157916.13          | 6.28  |
| 37                             | O94901     | Isoform 9 of SUN domain-containing protein 1                 | SUN1      | 11            | 3.14        | 0.003       | 90063.97           | 6.61  |
| 38                             | Q8N531     | F-box/LRR-repeat protein 6                                   | FBXL6     | 25            | 11.95       | 0.021       | 58588.09           | 9.51  |
| 39                             | P49642     | DNA primase small subunit                                    | PRIM1     | 2             | 23.80       | 0.014       | 49902.03           | 8.39  |
| 40                             | Q99873     | Protein arginine N-methyltransferase 1                       | PRMT1     | 13            | 2.28        | 0.015       | 42461.64           | 5.18  |

|    |        |                                                         |          |    |        |       |           |       |
|----|--------|---------------------------------------------------------|----------|----|--------|-------|-----------|-------|
| 41 | Q5VYS8 | Terminal uridylyltransferase 7                          | TUT7     | 31 | 2.64   | 0.003 | 171229.24 | 6.4   |
| 42 | Q13224 | Glutamate receptor ionotropic_ NMDA 2B                  | GRIN2B   | 6  | 71.53  | 0.008 | 163564.83 | 6.35  |
| 43 | Q86UV5 | Ubiquitin carboxyl-terminal hydrolase 48                | USP48    | 14 | 2.42   | 0.010 | 119032.28 | 5.75  |
| 44 | O15504 | Nucleoporin-like protein 2                              | NUP42    | 2  | 9.41   | 0.011 | 44871.63  | 9.25  |
| 45 | Q8WXE0 | Caskin-2                                                | CASKIN2  | 5  | 500.00 | 0.009 | 126783.3  | 6.63  |
| 46 | P42679 | Megakaryocyte-associated tyrosine-protein kinase        | MATK     | 6  | 43.26  | 0.006 | 56468.94  | 9.01  |
| 47 | P27797 | Calreticulin                                            | CALR     | 33 | 4.00   | 0.005 | 46466.37  | 4.29  |
| 48 | Q08380 | Galectin-3-binding protein                              | LGALS3BP | 18 | 2.10   | 0.014 | 63276.52  | 5.07  |
| 49 | P61313 | 60S ribosomal protein L15                               | RPL15    | 18 | 2.85   | 0.009 | 24014.88  | 11.62 |
| 50 | P04899 | Guanine nucleotide-binding protein G(i) subunit alpha-2 | GNAI2    | 14 | 2.92   | 0.007 | 40319.71  | 5.34  |
| 51 | P29279 | Connective tissue growth factor                         | CCN2     | 2  | 2.82   | 0.000 | 35492.23  | 8.31  |
| 52 | Q99798 | Aconitate hydratase_ mitochondrial                      | ACO2     | 21 | 1.94   | 0.004 | 82425.78  | 6.85  |
| 53 | Q9H583 | HEAT repeat-containing protein 1                        | HEATR1   | 20 | 2.37   | 0.026 | 242370.23 | 6.11  |
| 54 | P17039 | Zinc finger protein 30                                  | ZNF30    | 2  | 43.64  | 0.006 | 71417.49  | 9.27  |
| 55 | Q9Y5L2 | Hypoxia-inducible lipid droplet-associated protein      | HILPDA   | 1  | 2.23   | 0.033 | 6950.1    | 6.71  |
| 56 | P35557 | Glucokinase                                             | GCK      | 2  | 3.01   | 0.005 | 52191.43  | 5.1   |

| S. No.                         | Uniprot ID | Uniprot Name                                                    | Gene name | Peptide count | Fold change | Anova score | Mol. wt. (Daltons) | pI    |
|--------------------------------|------------|-----------------------------------------------------------------|-----------|---------------|-------------|-------------|--------------------|-------|
| List of Downregulated Proteins |            |                                                                 |           |               |             |             |                    |       |
| 57                             | P22626     | Heterogeneous nuclear ribonucleoproteins A2/B1                  | HNRNPA2B1 | 31            | 1.88        | 0.005       | 37429.7            | 8.97  |
| 58                             | P31327     | Carbamoyl-phosphate synthase [ammonia]_ mitochondrial           | CPS1      | 5             | 21.67       | 0.006       | 160549.19          | 5.92  |
| 60                             | P17066     | Heat shock 70 kDa protein 6                                     | HSPA6     | 27            | 1.89        | 0.001       | 71028.14           | 5.81  |
| 61                             | O60759     | Cytohesin-interacting protein                                   | CYTIP     | 4             | 6.84        | 0.008       | 40009.93           | 6.55  |
| 62                             | P38159     | RNA-binding motif protein_ X chromosome                         | RBMX      | 38            | 1.62        | 0.002       | 42331.85           | 10.06 |
| 63                             | Q14498     | RNA-binding protein 39                                          | RBM39     | 10            | 27.25       | 0.005       | 59248.39           | 10.1  |
| 64                             | Q8TEL6     | Short transient receptor potential channel 4-associated protein | TRPC4AP   | 5             | 20.69       | 0.026       | 90720.86           | 7.62  |
| 65                             | Q9P258     | Protein RCC2                                                    | RCC2      | 3             | 7.24        | 0.000       | 56084.52           | 9.02  |
| 66                             | Q14141     | Septin-6                                                        | SEPTIN6   | 3             | 21.97       | 0.004       | 49585.46           | 6.25  |
| 67                             | Q96J84     | Kin of IRRE-like protein 1                                      | KIRREL1   | 3             | 500.00      | 0.004       | 81714.57           | 5.55  |
| 68                             | Q92843     | Isoform 3 of Bcl-2-like protein 2                               | BCL2L2    | 2             | 5.10        | 0.022       | 20615.2            | 5.21  |
| 69                             | Q6NXT2     | Histone H3.3C                                                   | H3F3C     | 22            | 3.00        | 0.001       | 15082.54           | 11.11 |

|    |        |                                                                          |          |    |        |       |           |       |
|----|--------|--------------------------------------------------------------------------|----------|----|--------|-------|-----------|-------|
| 70 | P11388 | DNA topoisomerase 2-alpha                                                | TOP2A    | 47 | 2.76   | 0.006 | 174385.11 | 8.82  |
| 71 | O75526 | RNA-binding motif protein_ X-linked-like-2                               | RBMXL2   | 12 | 22.19  | 0.009 | 42814.21  | 10.33 |
| 72 | O14917 | Protocadherin-17                                                         | PCDH17   | 9  | 9.12   | 0.003 | 124298.99 | 5.03  |
| 73 | Q92878 | DNA repair protein RAD50                                                 | RAD50    | 34 | 3.36   | 0.019 | 153892.18 | 6.47  |
| 74 | P09525 | Annexin A4                                                               | ANXA4    | 5  | 2.00   | 0.004 | 35751.52  | 5.84  |
| 75 | Q9H963 | Putative zinc finger protein 702                                         | ZNF702P  | 16 | 1.91   | 0.020 | 15019.39  | 9.39  |
| 76 | P13073 | Cytochrome c oxidase subunit 4 isoform 1_ mitochondrial                  | COX4I1   | 7  | 4.48   | 0.004 | 17199.8   | 9.16  |
| 77 | P09884 | DNA polymerase alpha catalytic subunit                                   | POLA1    | 4  | 370.41 | 0.003 | 165912.77 | 5.61  |
| 78 | Q5TB80 | Centrosomal protein of 162 kDa                                           | CEP162   | 21 | 1.72   | 0.002 | 161943.01 | 5.36  |
| 79 | Q96GD3 | Polycomb protein SCMH1                                                   | SCMH1    | 25 | 12.13  | 0.021 | 73354     | 9.37  |
| 80 | O94776 | Metastasis-associated protein MTA2                                       | MTA2     | 6  | 3.39   | 0.002 | 75023.09  | 9.7   |
| 81 | P68431 | Histone H3.1                                                             | HIST1H3A | 12 | 3.00   | 0.001 | 15272.89  | 11.13 |
| 82 | P04844 | Dolichyl-diphosphooligosaccharide--protein glycosyltransferase subunit 2 | RPN2     | 15 | 1.97   | 0.011 | 67054.34  | 5.44  |
| 83 | O95197 | Reticulon-3                                                              | RTN3     | 10 | 3.25   | 0.012 | 112479.86 | 4.84  |
| 84 | P16144 | Integrin beta-4                                                          | ITGB4    | 35 | 5.19   | 0.013 | 199435.85 | 5.69  |
| 85 | Q5JSZ5 | Protein PRRC2B                                                           | PRRC2B   | 18 | 2.45   | 0.011 | 242966.6  | 8.55  |

| S. No.                         | Uniprot ID | Uniprot Name                                                                | Gene name | Peptide count | Fold change | Anova score | Mol. wt. (Daltons) | pI    |
|--------------------------------|------------|-----------------------------------------------------------------------------|-----------|---------------|-------------|-------------|--------------------|-------|
| List of Downregulated Proteins |            |                                                                             |           |               |             |             |                    |       |
| 86                             | O14646     | Chromodomain-helicase-DNA-binding protein 1                                 | CHD1      | 8             | 14.61       | 0.011       | 196687.53          | 6.68  |
| 87                             | Q9Y228     | TRAF3-interacting JNK-activating modulator                                  | TRAF3IP3  | 8             | 4.82        | 0.012       | 63626.3            | 8.79  |
| 88                             | Q8IWB6     | Inactive serine/threonine-protein kinase TEX14                              | TEX14     | 13            | 1.98        | 0.004       | 167900.67          | 5.03  |
| 90                             | Q9Y248     | DNA replication complex GINS protein PSF2                                   | GINS2     | 2             | 7.33        | 0.014       | 21427.73           | 5.29  |
| 91                             | O14561     | Acyl carrier protein_ mitochondrial                                         | NDUFAB1   | 2             | 95.37       | 0.009       | 10169.64           | 4.06  |
| 92                             | Q9ULK6     | RING finger protein 150                                                     | RNF150    | 3             | 2.95        | 0.003       | 44337.31           | 5.12  |
| 93                             | Q5T9S5     | Coiled-coil domain-containing protein 18                                    | CCDC18    | 9             | 3.44        | 0.011       | 168962.39          | 5.52  |
| 94                             | P63096     | Guanine nucleotide-binding protein G(i) subunit alpha-1                     | GNAI1     | 14            | 2.92        | 0.007       | 40229.89           | 5.7   |
| 95                             | Q9NX14     | NADH dehydrogenase [ubiquinone] 1 beta subcomplex subunit 11_ mitochondrial | NDUFB11   | 4             | 12.40       | 0.010       | 14310.04           | 4.58  |
| 96                             | Q09028     | Histone-binding protein RBBP4                                               | RBBP4     | 12            | 3.03        | 0.017       | 47524.51           | 4.74  |
| 97                             | P12883     | Myosin-7                                                                    | MYH7      | 20            | 1.57        | 0.015       | 223097.3           | 5.63  |
| 98                             | P62805     | Histone H4                                                                  | HIST1H4A  | 25            | 11.96       | 0.021       | 11236.15           | 11.36 |

|     |        |                                                                |          |    |        |       |           |       |
|-----|--------|----------------------------------------------------------------|----------|----|--------|-------|-----------|-------|
| 99  | Q93045 | Stathmin-2                                                     | STMN2    | 6  | 2.08   | 0.020 | 20828.05  | 8.4   |
| 100 | Q01650 | Large neutral amino acids transporter small subunit 1          | SLC7A5   | 3  | 1.83   | 0.002 | 55010.24  | 7.9   |
| 101 | A6NMY6 | Putative annexin A2-like protein                               | ANXA2P2  | 87 | 2.08   | 0.001 | 38527.82  | 6.48  |
| 102 | Q8TCT9 | Minor histocompatibility antigen H13                           | HM13     | 8  | 3.19   | 0.016 | 41488.34  | 6     |
| 103 | Q96JC4 | Zinc finger protein 479                                        | ZNF479   | 3  | 411.40 | 0.001 | 60597.86  | 9.21  |
| 104 | P62995 | Transformer-2 protein homolog beta                             | TRA2B    | 11 | 2.44   | 0.024 | 33534.48  | 11.25 |
| 105 | P08758 | Annexin A5                                                     | ANXA5    | 24 | 1.85   | 0.002 | 35805.58  | 4.93  |
| 106 | P0CG00 | Putative zinc finger and SCAN domain-containing protein 5D     | ZSCAN5DP | 1  | 2.62   | 0.003 | 56243.87  | 8.95  |
| 107 | Q9NYF8 | Bcl-2-associated transcription factor 1                        | BCLAF1   | 16 | 22.36  | 0.006 | 106122.11 | 9.99  |
| 108 | P25787 | Proteasome subunit alpha type-2                                | PSMA2    | 3  | 3.59   | 0.000 | 25767.39  | 7.12  |
| 109 | Q15424 | Scaffold attachment factor B1                                  | SAFB     | 22 | 2.18   | 0.006 | 102510.38 | 5.32  |
| 110 | Q99643 | Succinate dehydrogenase cytochrome b560 subunit_ mitochondrial | SDHC     | 1  | 500.00 | 0.000 | 15347.25  | 9.3   |
| 111 | P35637 | RNA-binding protein FUS                                        | FUS      | 15 | 5.18   | 0.004 | 53425.84  | 9.4   |
| 112 | Q02241 | Kinesin-like protein KIF23                                     | KIF23    | 6  | 2.48   | 0.002 | 110058.81 | 8.76  |
| 113 | Q15758 | Neutral amino acid transporter B(0)                            | SLC1A5   | 10 | 1.75   | 0.017 | 56598.34  | 5.34  |
| 114 | Q7L2J0 | 7SK snRNA methylphosphate capping enzyme                       | MEPCE    | 2  | 13.51  | 0.000 | 74355.24  | 9.62  |



| S. No.                         | Uniprot ID | Uniprot Name                                         | Gene name | Peptide count | Fold change | Anova score | Mol. wt. (Daltons) | pI    |
|--------------------------------|------------|------------------------------------------------------|-----------|---------------|-------------|-------------|--------------------|-------|
| List of Downregulated Proteins |            |                                                      |           |               |             |             |                    |       |
| 115                            | Q9P1U1     | Actin-related protein 3B                             | ACTR3B    | 4             | 2.50        | 0.008       | 47607.71           | 5.61  |
| 116                            | Q9C0B5     | Palmitoyltransferase ZDHHC5                          | ZDHHC5    | 25            | 11.95       | 0.021       | 77544.73           | 9.17  |
| 117                            | Q9H560     | Putative ankyrin repeat domain-containing protein 19 | ANKRD19P  | 3             | 30.82       | 0.016       | 30435.89           | 9.15  |
| 118                            | Q14833     | Metabotropic glutamate receptor 4;GRM4               | GRM4      | 25            | 11.95       | 0.021       | 98242.4            | 8.99  |
| 120                            | P84243     | Histone H3.3                                         | H3F3A     | 12            | 3.00        | 0.001       | 15196.72           | 11.27 |
| 121                            | Q9H6S1     | 5-azacytidine-induced protein 2                      | AZI2      | 3             | 2.03        | 0.007       | 44934.82           | 6.15  |
| 122                            | Q12873     | Chromodomain-helicase-DNA-binding protein 3          | CHD3      | 30            | 1.99        | 0.005       | 226591.68          | 6.92  |
| 123                            | Q9BYX2     | TBC1 domain family member 2A                         | TBC1D2    | 4             | 4.06        | 0.002       | 105413.83          | 6.15  |
| 124                            | Q92667     | A-kinase anchor protein 1_ mitochondrial             | AKAP1     | 3             | 371.33      | 0.010       | 93875.33           | 4.79  |
| 125                            | Q96NY7     | Chloride intracellular channel protein 6             | CLIC6     | 3             | 3.84        | 0.001       | 73011.52           | 4.29  |
| 126                            | Q14151     | Scaffold attachment factor B2                        | SAFB2     | 31            | 2.47        | 0.009       | 107342.23          | 5.84  |
| 127                            | Q1MSJ5     | Centrosome and spindle pole-associated protein 1     | CSPP1     | 11            | 2.50        | 0.002       | 145521.98          | 6.37  |

|     |        |                                                                       |            |    |       |       |           |       |
|-----|--------|-----------------------------------------------------------------------|------------|----|-------|-------|-----------|-------|
| 128 | Q5VVW2 | GTPase-activating Rap/Ran-GAP domain-like protein 3                   | GARNL3     | 3  | 7.53  | 0.014 | 112852.25 | 7.57  |
| 129 | Q8TAE8 | Growth arrest and DNA damage-inducible proteins-interacting protein 1 | GADD45GIP1 | 2  | 7.18  | 0.017 | 25383.83  | 10.03 |
| 130 | Q31612 | HLA class I histocompatibility antigen, B-73 alpha chain;HLA-B        | HLA-B      | 5  | 5.97  | 0.006 | 37868.01  | 5.84  |
| 131 | Q00325 | Phosphate carrier protein_ mitochondrial                              | SLC25A3    | 16 | 2.84  | 0.021 | 34896     | 9.29  |
| 132 | O75448 | Mediator of RNA polymerase II transcription subunit 24                | MED24      | 5  | 58.00 | 0.010 | 110305.27 | 6.51  |
| 133 | Q16891 | MICOS complex subunit MIC60                                           | IMMT       | 29 | 1.77  | 0.007 | 80026.46  | 5.71  |
| 134 | Q9Y5M8 | Signal recognition particle receptor subunit beta                     | SRPRB      | 3  | 2.02  | 0.000 | 29702.22  | 9.17  |
| 135 | Q9UHX1 | Poly(U)-binding-splicing factor PUF60                                 | PUF60      | 8  | 1.98  | 0.004 | 59875.47  | 5.19  |
| 136 | Q7Z353 | Highly divergent homeobox                                             | HDX        | 2  | 1.85  | 0.007 | 77205.72  | 5.61  |
| 137 | P43304 | Glycerol-3-phosphate dehydrogenase_ mitochondrial                     | GPD2       | 24 | 2.19  | 0.020 | 76361.33  | 6.3   |
| 138 | Q16695 | Histone H3.1t;HIST3H3                                                 | HIST3H3    | 22 | 3.00  | 0.001 | 15377.06  | 11.13 |
| 139 | Q96E39 | RNA binding motif protein_ X-linked-like-1                            | RBMXL1     | 34 | 1.75  | 0.004 | 42141.58  | 9.9   |
| 140 | P48741 | Putative heat shock 70 kDa protein 7;HSPA7                            | HSPA7      | 27 | 1.89  | 0.001 | 40244.45  | 7.72  |
| 141 | P51991 | Heterogeneous nuclear ribonucleoprotein A3                            | HNRNPA3    | 18 | 6.39  | 0.003 | 39594.94  | 9.1   |
| 142 | P02458 | Collagen alpha-1(II) chain                                            | COL2A1     | 4  | 6.55  | 0.002 | 96052.84  | 9.14  |
| 143 | O43166 | Signal-induced proliferation-associated 1-like protein 1              | SIPA1L1    | 15 | 1.70  | 0.013 | 200028.5  | 8.4   |

| S. No.                                | Uniprot ID | Uniprot Name                                              | Gene name | Peptide count | Fold change | Anova score | Mol. wt. (Daltons) | pI    |
|---------------------------------------|------------|-----------------------------------------------------------|-----------|---------------|-------------|-------------|--------------------|-------|
| <b>List of Downregulated Proteins</b> |            |                                                           |           |               |             |             |                    |       |
| 144                                   | P14210     | Hepatocyte growth factor                                  | HGF       | 4             | 2.10        | 0.016       | 53684.21           | 7.69  |
| 145                                   | Q9C0K3     | Actin-related protein 3C;ACTR3C                           | ACTR3C    | 4             | 2.49        | 0.008       | 21476.59           | 5.51  |
| 146                                   | P24821     | Tenascin                                                  | TNC       | 5             | 1.78        | 0.027       | 238645.74          | 4.79  |
| 147                                   | Q8I WV7    | E3 ubiquitin-protein ligase UBR1                          | UBR1      | 10            | 2.35        | 0.008       | 200079.4           | 5.67  |
| 148                                   | Q99623     | Prohibitin-2                                              | PHB2      | 28            | 2.38        | 0.004       | 33165.19           | 9.83  |
| 150                                   | P27824     | Calnexin                                                  | CANX      | 32            | 1.70        | 0.004       | 65395.57           | 4.46  |
| 151                                   | P46087     | Probable 28S rRNA (cytosine(4447)-C(5))-methyltransferase | NOP2      | 10            | 1.74        | 0.001       | 89301.81           | 9.27  |
| 152                                   | Q96KQ7     | Histone-lysine N-methyltransferase EHMT2                  | EHMT2     | 14            | 1.90        | 0.007       | 132239.29          | 5.3   |
| 153                                   | Q01459     | Di-N-acetylchitobiase;CTBS                                | CTBS      | 21            | 1.70        | 0.002       | 39755.93           | 5.43  |
| 154                                   | P62424     | 60S ribosomal protein L7a                                 | RPL7A     | 21            | 2.35        | 0.003       | 29995.62           | 10.61 |
| 155                                   | Q96K76     | Ubiquitin carboxyl-terminal hydrolase 47                  | USP47     | 5             | 1.56        | 0.004       | 157311.32          | 4.97  |
| 156                                   | P53701     | Cytochrome c-type heme lyase                              | HCCS      | 5             | 2.78        | 0.014       | 30470.39           | 6.28  |

|     |        |                                                                           |       |    |       |       |           |       |
|-----|--------|---------------------------------------------------------------------------|-------|----|-------|-------|-----------|-------|
| 157 | O14782 | Kinesin-like protein KIF3C                                                | KIF3C | 24 | 2.16  | 0.001 | 89426.22  | 8.28  |
| 158 | Q8NB50 | Zinc finger protein 62 homolog                                            | ZFP62 | 4  | 3.13  | 0.001 | 102511.07 | 9.24  |
| 159 | Q562F6 | Shugoshin 2                                                               | SGO2  | 18 | 3.56  | 0.015 | 144739.09 | 8.09  |
| 160 | P10916 | Myosin regulatory light chain 2, ventricular/cardiac muscle isoform;MYL2; | MYL2  | 25 | 11.93 | 0.021 | 18658.1   | 4.9   |
| 161 | Q16659 | Mitogen-activated protein kinase 6                                        | MAPK6 | 4  | 2.70  | 0.000 | 82680.82  | 4.91  |
| 162 | Q07955 | Serine/arginine-rich splicing factor 1                                    | SRSF1 | 20 | 2.24  | 0.002 | 27613.39  | 10.37 |
| 163 | Q9NR30 | Nucleolar RNA helicase 2                                                  | DDX21 | 35 | 3.56  | 0.006 | 87344.4   | 9.32  |
| 164 | Q6DN72 | Fc receptor-like protein 6                                                | FCRL6 | 2  | 18.08 | 0.006 | 45588.98  | 7.24  |
| 165 | P17987 | T-complex protein 1 subunit alpha                                         | TCP1  | 21 | 3.63  | 0.000 | 60343.58  | 5.8   |
| 166 | P16949 | Stathmin                                                                  | STMN1 | 6  | 1.82  | 0.035 | 17171.32  | 5.76  |
| 167 | Q7Z3Y7 | Keratin_ type I cytoskeletal 28                                           | KRT28 | 10 | 2.60  | 0.002 | 50567.39  | 5.33  |

**Supp. Table. 2**

**Supp. Table. 2.** List of proteins downregulated upon the reduced expression of  $\alpha$ -fodrin. The peptide count, fold change, ANOVA score, molecular wt. and pI values have also been listed.
