# Supplementary material for: α-Fodrin in Cytoskeletal Organization and the Activity of Certain Key Microtubule Kinesins
Source: MDPI journal article supplement (doi:10.3390/genes12050750), 2021-05-17
Supplement: s1 [file s1]

| S. No.                       | Uniprot ID | Uniprot Name                                           | Gene name | Peptide count | Fold change | Anova score | Mol. wt. (Daltons) | pI    |
|------------------------------|------------|--------------------------------------------------------|-----------|---------------|-------------|-------------|--------------------|-------|
| List of Upregulated proteins |            |                                                        |           |               |             |             |                    |       |
| 1                            | Q14240     | Eukaryotic initiation factor 4A-II                     | EIF4A2    | 19            | 2.20        | 0.016       | 46402.27           | 5.33  |
| 2                            | Q9BQE4     | Selenoprotein S                                        | SELENOS   | 18            | 2.32        | 0.018       | 21163              | 9.72  |
| 3                            | Q86Y38     | Xylosyltransferase 1                                   | XYLT1     | 5             | 2.42        | 0.013       | 107569.23          | 9.32  |
| 4                            | Q8N0W4     | Neurologin-4, X-linked;NLGN4X                          | NLGN4X    | 5             | 9.76        | 0.015       | 87303.62           | 5.74  |
| 5                            | P27986     | Phosphatidylinositol 3-kinase regulatory subunit alpha | PIK3R1    | 47            | 44.27       | 0.003       | 83467.2            | 5.83  |
| 6                            | Q9NUA8     | Zinc finger and BTB domain-containing protein 40       | ZBTB40    | 9             | 8.81        | 0.031       | 138118.3           | 6.11  |
| 7                            | Q5T0N1     | Cilia- and flagella-associated protein 70              | CFAP70    | 3             | 166.67      | 0.000       | 125720.71          | 5.57  |
| 8                            | O75828     | Carbonyl reductase [NADPH] 3                           | CBR3      | 2             | 6.62        | 0.015       | 30719.06           | 5.82  |
| 9                            | Q8TD47     | 40S ribosomal protein S4_ Y isoform 2                  | RPS4Y2    | 7             | 282.41      | 0.020       | 29295.42           | 10.1  |
| 10                           | O60825     | 6-phosphofructo-2-kinase/fructose-2_6-bisphosphatase 2 | PFKFB2    | 1             | 11.90       | 0.013       | 58345.6            | 8.61  |
| 11                           | P62269     | 40S ribosomal protein S18                              | RPS18     | 15            | 2.37        | 0.003       | 17587.48           | 10.99 |
| 12                           | O00487     | 26S proteasome non-ATPase regulatory subunit 14        | PSMD14    | 8             | 3.51        | 0.000       | 34577.04           | 6.06  |

|    |        |                                                            |          |    |         |       |           |      |
|----|--------|------------------------------------------------------------|----------|----|---------|-------|-----------|------|
| 13 | Q9NXL2 | Rho guanine nucleotide exchange factor 38                  | ARHGEF38 | 4  | 129.33  | 0.016 | 89077.53  | 5.87 |
| 14 | P11217 | Glycogen phosphorylase_ muscle form                        | PYGM     | 16 | 22.38   | 0.005 | 96960.86  | 6.57 |
| 15 | Q9Y6X6 | Unconventional myosin-XVI                                  | MYO16    | 9  | 134.82  | 0.006 | 206128.82 | 6.37 |
| 16 | Q5FWF6 | Zinc finger protein 789                                    | ZNF789   | 6  | 4.09    | 0.019 | 49984.16  | 9.3  |
| 17 | P21127 | Cyclin-dependent kinase 11B                                | CDK11B   | 3  | 7.70    | 0.025 | 92619.89  | 5.42 |
| 18 | Q99958 | Forkhead box protein C2                                    | FOXC2    | 2  | 1290.67 | 0.000 | 53719.3   | 8.68 |
| 19 | Q8TF44 | C2 calcium-dependent domain-containing protein 4C          | C2CD4C   | 22 | 3.37    | 0.026 | 44576.24  | 9.75 |
| 20 | Q9H9B1 | Histone-lysine N-methyltransferase EHMT1                   | EHMT1    | 6  | 17.84   | 0.003 | 141335.09 | 5.5  |
| 21 | P04350 | Tubulin beta-4A chain                                      | TUBB4A   | 25 | 12.00   | 0.006 | 49585.77  | 4.78 |
| 22 | Q2PPJ7 | Ral GTPase-activating protein subunit alpha-2              | RALGAPA2 | 13 | 2.24    | 0.011 | 210769.97 | 5.74 |
| 23 | Q6UB35 | Monofunctional C1-tetrahydrofolate synthase_ mitochondrial | MTHFD1L  | 5  | 3.92    | 0.004 | 102222.59 | 6.72 |
| 24 | P51825 | AF4/FMR2 family member 1                                   | AFF1     | 6  | 4.00    | 0.003 | 131421.52 | 9.26 |
| 25 | Q7RTR0 | NACHT_ LRR and PYD domains-containing protein 9            | NLRP9    | 4  | 93.21   | 0.004 | 113312.18 | 6.08 |
| 26 | P62987 | Ubiquitin-60S ribosomal protein L40                        | UBA52    | 18 | 7.20    | 0.013 | 8564.84   | 6.56 |
| 27 | P26640 | Valine-tRNA ligase                                         | VARS     | 8  | 3.60    | 0.003 | 140344.82 | 7.52 |
| 28 | P60842 | Eukaryotic initiation factor 4A-I                          | EIF4A1   | 18 | 2.22    | 0.016 | 46022.74  | 5.32 |

| S. No.                       | Uniprot ID | Uniprot Name                                                               | Gene name | Peptide count | Fold change | Anova score | Mol. wt. (Daltons) | pI   |
|------------------------------|------------|----------------------------------------------------------------------------|-----------|---------------|-------------|-------------|--------------------|------|
| List of Upregulated proteins |            |                                                                            |           |               |             |             |                    |      |
| 29                           | Q8IUR7     | Armadillo repeat-containing protein 8                                      | ARMC8     | 18            | 7.26        | 0.017       | 75378.09           | 6.28 |
| 30                           | O95644     | Nuclear factor of activated T-cells_ cytoplasmic 1                         | NFATC1    | 2             | 535.54      | 0.007       | 101242.76          | 6.52 |
| 31                           | P0CG48     | Polyubiquitin-C                                                            | UBC       | 18            | 7.21        | 0.013       | 8564.84            | 6.56 |
| 32                           | E9PAV3     | Nascent polypeptide-associated complex subunit alpha_ muscle-specific form | NACA      | 27            | 3.02        | 0.005       | 205421.52          | 9.6  |
| 33                           | P51523     | Zinc finger protein 84                                                     | ZNF84     | 2             | 162.58      | 0.018       | 85457.46           | 9.05 |
| 34                           | P07437     | Tubulin beta chain                                                         | TUBB      | 26            | 46.20       | 0.009       | 49670.82           | 4.78 |
| 35                           | Q9UJX0     | Oxidative stress-induced growth inhibitor 1                                | OSGIN1    | 2             | 31.57       | 0.016       | 51992.33           | 6.63 |
| 36                           | Q9P035     | Very-long-chain (3R)-3-hydroxyacyl-CoA dehydratase 3                       | HACD3     | 7             | 3.84        | 0.003       | 43159.55           | 9.04 |
| 37                           | Q5JWF2     | Guanine nucleotide-binding protein G(s) subunit alpha isoforms XLas        | GNAS      | 22            | 3.37        | 0.026       | 111024.52          | 4.91 |
| 38                           | P19447     | TFIIH basal transcription factor complex helicase XPB subunit              | ERCC3     | 4             | 9.95        | 0.020       | 89277.7            | 6.83 |
| 39                           | Q8N8S7     | Protein enabled homolog                                                    | ENAH      | 4             | 2.88        | 0.008       | 66510.26           | 6.51 |
| 40                           | P06454     | Prothymosin alpha                                                          | PTMA      | 2             | 12.59       | 0.002       | 12202.96           | 3.66 |

|    |        |                                                                                   |         |    |       |       |           |      |
|----|--------|-----------------------------------------------------------------------------------|---------|----|-------|-------|-----------|------|
| 41 | Q9BZK3 | Putative nascent polypeptide-associated complex subunit alpha-like protein;NACAP1 | NACA4P  | 27 | 3.02  | 0.005 | 23306.03  | 4.53 |
| 42 | Q7Z4T8 | Inactive polypeptide N-acetylgalactosaminyltransferase-like protein 5             | GALNTL5 | 5  | 2.50  | 0.013 | 51427.46  | 8.88 |
| 43 | Q9H4M9 | EH domain-containing protein 1                                                    | EHD1    | 6  | 25.99 | 0.001 | 60626.86  | 6.35 |
| 44 | O60828 | Polyglutamine-binding protein 1                                                   | PQBP1   | 3  | 3.44  | 0.013 | 30341.06  | 5.93 |
| 45 | Q02790 | Peptidyl-prolyl cis-trans isomerase FKBP4                                         | FKBP4   | 4  | 3.41  | 0.009 | 51804.56  | 5.35 |
| 46 | P45880 | Voltage-dependent anion-selective channel protein 2                               | VDAC2   | 19 | 1.95  | 0.023 | 31435.31  | 7.66 |
| 47 | P67809 | Nuclease-sensitive element-binding protein 1                                      | YBX1    | 12 | 2.29  | 0.002 | 35793     | 9.87 |
| 48 | Q14146 | Unhealthy ribosome biogenesis protein 2 homolog                                   | URB2    | 13 | 5.94  | 0.018 | 170544.11 | 6.97 |
| 49 | P78371 | T-complex protein 1 subunit beta                                                  | CCT2    | 15 | 19.15 | 0.003 | 57357.02  | 6.02 |
| 50 | P07205 | Phosphoglycerate kinase 2                                                         | PGK2    | 15 | 8.45  | 0.015 | 44664.93  | 8.74 |
| 51 | Q9UQ88 | Cyclin-dependent kinase 11A                                                       | CDK11A  | 3  | 7.70  | 0.025 | 91361.58  | 5.28 |
| 52 | Q6ZMV9 | Kinesin-like protein KIF6                                                         | KIF6    | 11 | 3.62  | 0.017 | 92569.23  | 6.47 |
| 53 | Q96DX4 | RING finger and SPRY domain-containing protein 1                                  | RSPRY1  | 2  | 6.06  | 0.004 | 62444.1   | 5.29 |
| 54 | Q96AJ1 | Clusterin-associated protein 1                                                    | CLUAP1  | 6  | 21.05 | 0.030 | 48125.05  | 4.68 |
| 55 | O75582 | Ribosomal protein S6 kinase alpha-5                                               | RPS6KA5 | 4  | 52.76 | 0.009 | 89865.42  | 6.63 |
| 56 | Q9HCH3 | Copine-5                                                                          | CPNE5   | 2  | 3.12  | 0.010 | 65733.57  | 5.65 |

| S. No.                       | Uniprot ID | Uniprot Name                                          | Gene name | Peptide count | Fold change | Anova score | Mol. wt. (Daltons) | pI   |
|------------------------------|------------|-------------------------------------------------------|-----------|---------------|-------------|-------------|--------------------|------|
| List of Upregulated proteins |            |                                                       |           |               |             |             |                    |      |
| 57                           | B0I1T2     | Unconventional myosin-Ig                              | MYO1G     | 4             | 8.96        | 0.004       | 116442.08          | 8.96 |
| 58                           | Q0VF96     | Cingulin-like protein 1                               | CGNL1     | 29            | 5.48        | 0.002       | 149079.19          | 5.51 |
| 59                           | P98196     | Probable phospholipid-transporting ATPase IH          | ATP11A    | 4             | 9.31        | 0.001       | 129755.75          | 6.17 |
| 60                           | P22102     | Trifunctional purine biosynthetic protein adenosine-3 | GART      | 5             | 16.58       | 0.020       | 107636             | 6.27 |
| 61                           | Q8NEZ5     | F-box only protein 22                                 | FBXO22    | 3             | 710.00      | 0.006       | 44508.36           | 6.61 |
| 62                           | O95376     | E3 ubiquitin-protein ligase ARIH2                     | ARIH2     | 7             | 3.69        | 0.004       | 57818.86           | 5.4  |
| 63                           | Q96RY7     | Intraflagellar transport protein 140 homolog          | IFT140    | 13            | 2.47        | 0.005       | 165192.81          | 5.69 |
| 64                           | O43182     | Rho GTPase-activating protein 6                       | ARHGAP6   | 8             | 3.46        | 0.010       | 105947.49          | 7    |
| 65                           | Q8TDY2     | RB1-inducible coiled-coil protein 1                   | RB1CC1    | 23            | 2.69        | 0.022       | 183090.86          | 5.3  |
| 66                           | Q01813     | ATP-dependent 6-phosphofructokinase_ platelet type    | PFKP      | 16            | 4.63        | 0.002       | 85596.06           | 7.5  |
| 67                           | P08134     | Rho-related GTP-binding protein RhoC                  | RHOC      | 9             | 5.39        | 0.005       | 21682.93           | 6.2  |
| 68                           | Q8NFZ3     | Neuroigin-4_ Y-linked                                 | NLGN4Y    | 5             | 9.76        | 0.015       | 87193.62           | 5.72 |

|    |        |                                                                            |         |    |       |       |           |       |
|----|--------|----------------------------------------------------------------------------|---------|----|-------|-------|-----------|-------|
| 69 | Q68D10 | Protein SPT2 homolog                                                       | SPTY2D1 | 11 | 8.92  | 0.009 | 75598.69  | 9.79  |
| 70 | Q9UPR6 | Zinc finger RNA-binding protein 2                                          | ZFR2    | 4  | 3.22  | 0.003 | 101330.37 | 8.76  |
| 71 | P62745 | Rho-related GTP-binding protein RhoB                                       | RHOB    | 9  | 5.39  | 0.005 | 21782.92  | 5     |
| 72 | Q9H2T7 | Ran-binding protein 17;RANBP17                                             | RANBP17 | 18 | 2.32  | 0.018 | 124244.11 | 6.03  |
| 73 | P0CAP1 | Myocardial zonula adherens protein                                         | MYZAP   | 3  | 2.20  | 0.020 | 52247.29  | 5.72  |
| 74 | Q92538 | Golgi-specific brefeldin A-resistance guanine nucleotide exchange factor 1 | GBF1    | 7  | 10.38 | 0.003 | 206445.89 | 5.48  |
| 75 | P16152 | Carbonyl reductase [NADPH] 1                                               | CBR1    | 2  | 6.63  | 0.015 | 30243.75  | 8.55  |
| 76 | Q92901 | 60S ribosomal protein L3-like                                              | RPL3L   | 12 | 4.54  | 0.004 | 46295.98  | 10.45 |
| 77 | Q96GQ7 | Probable ATP-dependent RNA helicase DDX27                                  | DDX27   | 3  | 21.79 | 0.018 | 89835.25  | 9.33  |
| 78 | P0CG47 | Polyubiquitin-B;UBB                                                        | UBB     | 18 | 7.21  | 0.013 | 8564.84   | 6.56  |

**Supp. Table. 1**

**Supp. Table. 1.** List of proteins upregulated upon the downregulation of  $\alpha$ -fodrin in U-251 MG cells. The peptide count, fold change, ANOVA score, molecular wt. and pI values have also been listed.
